# Supplementary material for: Co-Expression Network Analysis of MicroRNAs and Proteins in Severe Traumatic Brain Injury: A Systematic Review
Source: MDPI journal article supplement (doi:10.3390/cells10092425), 2021-09-14
Supplement: s1 [file s1]

## **SUPPLEMENTARY MATERIALS**

### **Co-expression network analysis of microRNAs and proteins in severe traumatic brain injury: a systematic review**

Claire Osgood <sup>1</sup>, Zubair Ahmed <sup>1,2,3\*</sup> and Valentina Di Pietro <sup>1,2,3\*</sup>

1 Neuroscience and Ophthalmology, Institute of Inflammation and Ageing, University of Birmingham, Edgbaston, Birmingham, B15 2TT, UK;

CXO738@student.bham.ac.uk

2 Centre for Trauma Sciences Research, Edgbaston, Birmingham, B15 2TT, UK;

3 Surgical Reconstruction and Microbiology Research Centre, National Institute for Health Research, Queen Elizabeth Hospital, Birmingham, B15 2TH, UK;

\* Correspondence: z.ahmed.1@bham.ac.uk (Z.A.); v.dipietro@bham.ac.uk (V.D.P).

#### **Supplementary Materials**

**Table S1.** Study characteristics and differentially regulated miRNAs post-sTBI.

**Table S2.** Study characteristics and differentially proteins post-sTBI.

**Table S3.** Common miRNA targets and differentially expressed proteins.

**Table S4.** KEGG pathways identified for miRNAs and proteins with inverse expression relationships and their significance (p-value). Pathways highlighted in blue represent common pathways.

**Table S1.** Study characteristics and miRNAs differentially regulated in post-sTBI rat brains.

Reference; year of publication; injury model (CCI = controlled cortical impact, FPI = fluid percussion injury, PBB I = penetrating ballistic-like brain injury); brain site; Time point groups (Time <3 d , 3d<Time <2w , Time >1m ); methodology (NGS = next generation sequencing, qRT-PCR = real-time quantitative reverse transcription polymerase chain reaction, qPCR = quantitative polymerase chain reaction).

| Study                           | Year | Injury Model | Brain site    | Time <3 d                                                                                                                                                                                                                                                                                                                                                                                                                                                                                                                                                                                                                                                                                            | 3d<Time <2w                                                                                                                                | Time >1m                                                                                                                                                   | Methodology |
|---------------------------------|------|--------------|---------------|------------------------------------------------------------------------------------------------------------------------------------------------------------------------------------------------------------------------------------------------------------------------------------------------------------------------------------------------------------------------------------------------------------------------------------------------------------------------------------------------------------------------------------------------------------------------------------------------------------------------------------------------------------------------------------------------------|--------------------------------------------------------------------------------------------------------------------------------------------|------------------------------------------------------------------------------------------------------------------------------------------------------------|-------------|
| Hu et al. <sup>[31]</sup>       | 2012 | CCI          | hippocampus   | <b>24 h ↑:</b><br>miR-200a, miR-200b, miR-439, miR23a, miR-873, miR-153, miR-499, miR-381<br><b>24h ↓:</b><br>miR-31, miR-541, miR-598-5p, miR-19a, miR-19b, miR-222, miR-296, miR-708, miR-144, miR-341, miR-136, miR-148-5p, miR-342-5p                                                                                                                                                                                                                                                                                                                                                                                                                                                            | <b>7 d ↑:</b><br>miR-23a, miR-363 and miR-130b<br><b>7d ↓:</b><br>miR-190, miR-135b, miR-342-5p, miR-135a, miR-148b-5p, miR136 and miR-144 |                                                                                                                                                            | NGS         |
| Jadhav et al. <sup>[32]</sup>   | 2014 | Rodent FPI   | forebrain     | <b>24h ↓:</b><br>miR-200b                                                                                                                                                                                                                                                                                                                                                                                                                                                                                                                                                                                                                                                                            |                                                                                                                                            |                                                                                                                                                            | qRT-PCR     |
| Korotkov et al. <sup>[33]</sup> | 2020 | Lateral FPI  | cortex        |                                                                                                                                                                                                                                                                                                                                                                                                                                                                                                                                                                                                                                                                                                      | <b>2w ↑:</b><br>miR-142, miR-155                                                                                                           |                                                                                                                                                            | qRT-PCR     |
| Puhakka et al. <sup>[34]</sup>  | 2017 | Lateral FPI  | dentate gyrus |                                                                                                                                                                                                                                                                                                                                                                                                                                                                                                                                                                                                                                                                                                      |                                                                                                                                            | <b>3m ↓:</b><br>miR-369-3p, miR-384-3p, miR136-5p, miR-127-3p, miR-136-3p, miR-335, miR-376a-3p, miR-551b3p, miR-341, miR-139-5p, miR127- 5p and miR-9a-3p | qRT-PCR     |
| Redell et al. <sup>[35]</sup>   | 2009 | CCI          | hippocampus   | <b>3h ↑:</b><br>miR-214, miR-298, miR-30a-3p, miR30a-5p, miR-30c, miR-467b, miR-665, miR-675-5p, miR-691, miR-721, miR327<br><b>24h ↑:</b><br>miR-126-3p, miR-155, miR-19b, miR-21, miR-223, miR-292-5p, miR-9, miR-92<br><b>3h and 24h ↑:</b><br>miR-23a, miR-23b, miR-290, miR-30b, miR-30e, miR-451, miR-467a, miR-671, miR-680, miR-685, miR-689, miR-705, miR-711, miR-714, miR-744, miR-762<br><b>3h ↓:</b><br>miR-125a, miR-125b, miR-127, miR-146b, miR-148a, miR-148b, miR-181a, miR-22, miR-221, miR25, miR-320, miR-325, miR-346, miR-376a, miR-485-5p, miR-652, miR-674, miR-690, miR-99b, miR-221<br><b>24h ↓:</b><br>miR-129-3p, miR-328, miR-361 and miR-487b<br><b>3h and 24h ↓:</b> |                                                                                                                                            |                                                                                                                                                            | qRT-PCR     |

|                                    |      |             |               |                                                                                                                                                                                                                                                                       |                                                                                                                                                                                                                                                                                                                                                                                                                                       |                                        |         |
|------------------------------------|------|-------------|---------------|-----------------------------------------------------------------------------------------------------------------------------------------------------------------------------------------------------------------------------------------------------------------------|---------------------------------------------------------------------------------------------------------------------------------------------------------------------------------------------------------------------------------------------------------------------------------------------------------------------------------------------------------------------------------------------------------------------------------------|----------------------------------------|---------|
|                                    |      |             |               | miR-103, miR-107, miR-130a, miR-140, miR-150, miR151, miR-181b, miR-185, miR-191, miR-222, miR-323, miR-329, miR-330, miR-379, miR-382, miR-383, miR-422b, miR-433-3p, miR-495, miR-541, miR-543, miR-667, miR140 and miR-151                                         |                                                                                                                                                                                                                                                                                                                                                                                                                                       |                                        |         |
| Thangavel u et al. <sup>[36]</sup> | 2020 | PBBI        | coronal brain | <div>1d ↑:</div> <div>miR-21, miR-34b, miR-223, miR-1274a, miR-155</div> <div>3d ↑:</div> <div>miR-451, miR-685</div> <div>1d ↓:</div> <div>miR-19a, miR-327, miR-135a</div> <div>3d ↓:</div> <div>miR-328, miR-34b, miR-335, miR-329, miR-667</div>                  | <div>7 d ↑:</div> <div>miR-298, miR-466c, miR-130b, miR-146a, miR-503, miR-224, miR-18a, miR-450, miR-363, miR-142, miR-28, miR-31, miR-10a, miR-21, miR-20b, miR-147b, miR-449, miR-18a, miR-200c, miR-449b, miR-34c, miR-199b, miR-199a, miR-374, miR-155, miR-214, miR-196c, miR-223</div> <div>7d ↓:</div> <div>miR-411, miR-667, miR-136, miR-335, miR-434, miR-328, miR181a, miR-376c, miR-409, miR-802, miR-29c, miR-139</div> |                                        | qPCR    |
| Vuokila et al. <sup>[37]</sup>     | 2020 | Lateral FPI | cortex        |                                                                                                                                                                                                                                                                       | <div>7d ↓:</div> <div>miR-124-3p</div>                                                                                                                                                                                                                                                                                                                                                                                                | <div>3m ↓:</div> <div>miR-124-3p</div> | qRT-PCR |
| Vuokila et al. <sup>[38]</sup>     | 2018 | Lateral FPI | dentate gyrus |                                                                                                                                                                                                                                                                       |                                                                                                                                                                                                                                                                                                                                                                                                                                       | <div>3m ↓:</div> <div>miR-124-3p</div> | qRT-PCR |
| Wang et al. <sup>[39]</sup>        | 2021 | CCI         | hippocampus   | <div>1d ↑:</div> <div>miR-142-3p, 142-5p, miR-146a, miR-155, miR-223, miR-19b</div> <div>3d ↑:</div> <div>miR-142-3p, miR-142-5p, miR-146a, miR-155, miR-223, miR-19b</div> <div>1d ↓:</div> <div>miR-124, miR-150</div> <div>3d ↓:</div> <div>miR-124, miR-150</div> | <div>7d ↑:</div> <div>miR-124,155</div> <div>7d ↓:</div> <div>miR-142-3p, miR-142-5p, miR146a, miR-150, miR-22 and miR19b</div>                                                                                                                                                                                                                                                                                                       |                                        | qRT-PCR |
| Xiao et al. <sup>[40]</sup>        | 2020 | Lateral FPI | hippocampus   | <div>3h, 6h, 12h, 24h and 48h ↑:</div> <div>miR-9a-3p, miR-21-5p, miR-132-3p, miR-219-5p</div> <div>3h, 6h, 12h, 24h and 48h ↓:</div> <div>miR-9a-5p, miR-125b-5p, miR347, miR-30c-5p, miR-212-3p, miR-29a-3p</div>                                                   |                                                                                                                                                                                                                                                                                                                                                                                                                                       |                                        | qRT-PCR |

**Table S2.** Study characteristics and proteins differentially regulated in post-sTBI rat brains.

Reference; year of publication; injury model (CCI = controlled cortical impact, FPI = fluid percussion injury, PBB1 = penetrating ballistic-like brain injury); brain site; Time point groups (Time <3 d , 3d<Time <2w , Time >1m ); methodology (WB = Western Blot, qRT-PCR = real-time quantitative reverse transcription polymerase chain reaction, qPCR = quantitative polymerase chain reaction, ICH= Immunohistochemistry).

| Study                                | Year | Injury Model       | Brain site                                                                     | <3 d                                                                                                        | 3d<Time <2w                                                                                   | >1m                                               | Methodology |
|--------------------------------------|------|--------------------|--------------------------------------------------------------------------------|-------------------------------------------------------------------------------------------------------------|-----------------------------------------------------------------------------------------------|---------------------------------------------------|-------------|
| Anderson et al. <sup>[41]</sup>      | 2008 | CCI                | brainstem, cortex, hippocampus                                                 | <b>6h, 24h, 48h</b> ↑:<br>pNF-H                                                                             |                                                                                               |                                                   | ELISA       |
| Anwer et al. <sup>[42]</sup>         | 2020 | Lateral FPI        | hypothalamus                                                                   | <b>2h, 48h</b> ↓:<br>SRPX2                                                                                  | <b>14d</b> ↓:<br>SRPX2                                                                        |                                                   | WB          |
| Bonneh-Barkay et al. <sup>[43]</sup> | 2010 | CCI                | parietal cortex                                                                | <b>1d, 2d, 3d</b> ↑:<br>KL-40                                                                               | <b>4d, 6d, 8d, 12d</b> ↑:<br>KL-40                                                            |                                                   | qPCR        |
| Cui et al. <sup>[44]</sup>           | 2011 | Micro knife injury | cortex                                                                         | <b>12h, 1d, 3d</b> ↑:<br>Foxj1                                                                              | <b>5d, 7d</b> ↑:<br>Foxj1                                                                     | <b>14d, 28d</b> ↑:<br>Foxj1                       | WB          |
| Dalgard et al. <sup>[45]</sup>       | 2012 | CCI                | cortex                                                                         | <b>4h, 12h, 24h, 3d</b> ↑:<br>CXCL1, IFN- $\gamma$ , TNF- $\alpha$ , IL-1 $\beta$ , IL-4, IL13, CCL2, CCL20 | <b>7d</b> ↑:<br>CXCL1, IFN- $\gamma$ , TNF- $\alpha$ , IL-1 $\beta$ , IL-4, IL13, CCL2, CCL20 |                                                   | ELISA       |
| Das Gupta et al. <sup>[46]</sup>     | 2019 | Lateral FPI        | cortex, thalamus                                                               |                                                                                                             |                                                                                               | <b>7d-1m, 14d-12m</b> ↑:<br>CLU                   | qRT-PCR     |
| Dawish et al. <sup>[47]</sup>        | 2012 | CCI                | hippocampus                                                                    |                                                                                                             |                                                                                               | <b>25d</b> ↓:<br>SYP                              | IHC         |
| DeDominicis et al. <sup>[48]</sup>   | 2018 | PBBI               | hippocampus, striatum, cortex, midbrain                                        | <b>24h</b> ↑:<br>GFAP, SBDP-145/150,<br><b>24h</b> ↓:<br>SPTN1                                              | <b>7d</b> ↑:<br>SBDP-145/150                                                                  | <b>1m, 3m</b> ↑:<br>GFAP<br><b>3m</b> ↓:<br>SPTN1 | WB          |
| Kilbourne et al. <sup>[49]</sup>     | 2009 | Maryl and model    | cortex, corpus callosum, caudate, putamen, thalamus, cerebellum, and brainstem | <b>1d</b> ↑:<br>$\beta$ -APP                                                                                | <b>7d</b> ↑:<br>$\beta$ -APP                                                                  |                                                   | IHC         |

|                                 |      |             |                     |                                                                                                                                                                                                                                                                                                                                                          |                                                                                                                                                                                                                                                                                                              |       |
|---------------------------------|------|-------------|---------------------|----------------------------------------------------------------------------------------------------------------------------------------------------------------------------------------------------------------------------------------------------------------------------------------------------------------------------------------------------------|--------------------------------------------------------------------------------------------------------------------------------------------------------------------------------------------------------------------------------------------------------------------------------------------------------------|-------|
| Kobeissy et al. <sup>[50]</sup> | 2016 | CCI         | cortex              | <p><b>1d ↑:</b><br/>PIN1, SRPRB, EEF2, ACO1, C3, C3 (fragment), GMPS, HSC70, DPYSL2, DPYSL3, DPYSL5, PKM1/M2, WDR1, A1i3, Mug1, ALB, CKBB, PACSIN, ENO2, BASP1, KKB1A, HbB, VBS, CFH, ENO1, PDI</p> <p><b>1d ↓:</b><br/>ACO2, MnSOD, TPI1, GST (fragment), GSTM1, DJ-1, MMIF, PLCB1, UBA1, NF, CALR, CaM, STXBP1, ENO1, FH, STMN1, CFL1</p>              | <p><b>7d ↑:</b><br/>PIN1, SRPRB, EEF2, ACO1, C3, C3 (fragment), GMPS, HSC70, DPYSL2, DPYSL3, DPYSL5, PKM1/M2, WDR1, A1i3, Mug1, ALB, CKBB, PACSIN, ENO2, BASP1, AnxA5, LDH-B, CRYM.</p> <p><b>7d ↓:</b><br/>ACO2, MnSOD, TPI1, GST (fragment), GSTM1, DJ-1, MMIF, PLCB1, UBA1, NF, CALR, CaM and STXBP1.</p> | WB    |
| Kobeissy et al. <sup>[51]</sup> | 2015 | CCI         | cortex              | <p><b>2h, 6h, 24h, 3d, ↑:</b><br/>βsBDPs</p> <p><b>2h, 6h, 24h, 3d ↓:</b><br/>SPTBN1</p>                                                                                                                                                                                                                                                                 | <p><b>5d, 7d, 14d ↑:</b><br/>βsBDPs</p> <p><b>5d, 7d, 14d ↓:</b><br/>SPTBN1</p>                                                                                                                                                                                                                              | WB    |
| Kobeissy et al. <sup>[52]</sup> | 2006 | CCI         | cortex              | <p><b>48h ↑:</b><br/>CA1, ARF3, TF, GFER, HbA, HbB, FETUB, OXCT1, MDH1, NAD, LDH-B, MDH2, CES1, SERPINA1, HP, UCLH1, SERPINA1, SERPINA2, T-KNG, ALB, APP, GC, GDI1, CRMP-2, CP, SPTAN1, CRP, PSMA7, SYT</p> <p><b>48h ↓:</b><br/>ANXA11, ALDH7A1, CFL1, PFN1, PKM2, ENO1, GAPDH, HK1, ACSS2, PGK2, PGK1, Hsc70-ps1, GLUD1, ALDOA, ALDOC, DDAH1, MAP2</p> |                                                                                                                                                                                                                                                                                                              | WB    |
| Liu et al. <sup>[53]</sup>      | 2015 | Blast model | cortex              | <p><b>6h, 12h, 24h, 72h ↑:</b><br/>S-100β, MBP, ENO1, IL-8, IL-10, iNOS, HIF-1α</p>                                                                                                                                                                                                                                                                      | <p><b>1w ↑:</b><br/>S-100β, MBP, ENO1, IL-8, IL-10, iNOS, HIF-1α.</p>                                                                                                                                                                                                                                        | ELISA |
| Liu et al. <sup>[54]</sup>      | 2006 | CCI         | hippocampus, cortex | <p><b>2h, 3d ↓:</b><br/>MBP</p>                                                                                                                                                                                                                                                                                                                          |                                                                                                                                                                                                                                                                                                              | WB    |
| McDonald et al. <sup>[55]</sup> | 2018 | CCI         | NA                  | <p><b>1h, 3h ↑:</b><br/>LPA</p>                                                                                                                                                                                                                                                                                                                          |                                                                                                                                                                                                                                                                                                              | IHC   |
| Mrozek et al. <sup>[56]</sup>   | 2019 | Weight drop | neocortex           | <p><b>4h ↑:</b><br/>GFAP, UCH-L1 and MMP-9</p>                                                                                                                                                                                                                                                                                                           |                                                                                                                                                                                                                                                                                                              | WB    |

|                                   |      |      |                     |                                                                                                                                                                                                                                                                                                                                                                                                                                                                                      |                                                    |
|-----------------------------------|------|------|---------------------|--------------------------------------------------------------------------------------------------------------------------------------------------------------------------------------------------------------------------------------------------------------------------------------------------------------------------------------------------------------------------------------------------------------------------------------------------------------------------------------|----------------------------------------------------|
| Ottens et al. <sup>[57]</sup>     | 2010 | CCI  | neocortex           | <div> <div>2d ↑:</div> <div>P-2, AHCY, AK1, ALB, ALDOC, FETUB, HSP10, HSP70, A1M, NSE, NRGN, PRDX2, PP2A, STIP1, ALDH5A1, SYN2, TF, TKT, SPTN1</div> </div> <div> <div>2d ↓:</div> <div>HIBADH, ALDH9A1, ACTA1, ARF1, GPT, ALDOC, AMPH, GOT1, ATP6V1, CBR, COPS2, ENO1, GAPDH, GARS1, PYGB, HSPH1, HSP90, HNRNP, IMPA, IREB1, HSPA4, MAPT, MAP2, NLN, NECAB1/2, NDRG2, PCNP, PDCD6IP, PDHA1, RAB3C, PREP, PPP3CC, SGTA, SOD1, SNAP25, THOP1, TAGLN3, TUBB, UCLH1, SPTN1</div> </div> | WB                                                 |
| Ottens et al. <sup>[58]</sup>     | 2008 | CCI  | cortex              | <div> <div>2d ↓:</div> <div>MBP</div> </div>                                                                                                                                                                                                                                                                                                                                                                                                                                         | WB                                                 |
| Pabón et al. <sup>[59]</sup>      | 2015 | CCI  | frontal cortex      | <div> <div>3d ↑:</div> <div>MHCII, Ki-67/nestin</div> </div>                                                                                                                                                                                                                                                                                                                                                                                                                         | IHC                                                |
| Rubenstein et al. <sup>[60]</sup> | 2015 | CCI  | whole brain         | <div> <div>2h, 1d, 2d, 3d ↑:</div> <div>T-tau, P-tau</div> </div> <div> <div>7d, 14d ↑:</div> <div>T-tau, P-tau</div> </div> <div> <div>30d ↑:</div> <div>T-tau, P-tau</div> </div>                                                                                                                                                                                                                                                                                                  | WB/ELISA                                           |
| Schober et al. <sup>[61]</sup>    | 2014 | CCI  | hippocampus, cortex | <div> <div>1d, 2d, 3d, ↑:</div> <div>145 and 120 SBDPs</div> </div> <div> <div>1d,2d,3d ↓:</div> <div>SPTN1</div> </div> <div> <div>5d, 7d, 14d ↑:</div> <div>145 and 120 SBDPs</div> </div> <div> <div>5d,7d,14d ↓:</div> <div>SPTN1</div> </div>                                                                                                                                                                                                                                   | WB                                                 |
| Thangavelu et al. <sup>[36]</sup> | 2020 | PBBI | whole brain         | <div> <div>3d ↑:</div> <div>BACE1</div> </div> <div> <div>3d ↓:</div> <div>APP</div> </div> <div> <div>7d ↑:</div> <div>BACE1, (Aβ)-40;</div> </div> <div> <div>3d ↓:</div> <div>APP</div> </div>                                                                                                                                                                                                                                                                                    | qPCR                                               |
| Yao et al. <sup>[62]</sup>        | 2009 | PBBI | whole brain         | <div> <div>6-72h ↑:</div> <div>p43=pro-EMAPII</div> </div>                                                                                                                                                                                                                                                                                                                                                                                                                           | WB/IHC                                             |
| Zheng et al. <sup>[63]</sup>      | 2020 | CCI  | hippocampus         | <div> <div>1d ↑:</div> <div>propionylcarnitine, palmitoylcarnitine, OAT</div> </div> <div> <div>3d ↑:</div> <div>CSAD, OAT, BHMT, 1-norleucine, 1-Methylhistidine, SLC23A2, propionylcarnitine, palmitoylcarnitine.</div> </div> <div> <div>1d ↓:</div> <div>TPH, CHAT, 4-Guanidinobutyric acid, HPRT1, xanthosine.</div> </div> <div> <div>3d ↓:</div> <div>adenine and 4-Guanidinobutyric acid</div> </div>                                                                        | <div>Metabolomics/</div> <div>bioinformatics</div> |

**Table S3.** Common miRNA targets and differentially expressed proteins.

| <b>Common miRNA targets and proteins (<i>n</i> = 57):</b> |        |
|-----------------------------------------------------------|--------|
| Foxj1                                                     | GLUD1  |
| CXCL1                                                     | ALDOA  |
| CCL2                                                      | DDAH1  |
| CCL20                                                     | MAP2   |
| ACO1                                                      | NRGN   |
| C3                                                        | PRDX2  |
| GMPS                                                      | SYN2   |
| DPYSL2                                                    | HIBAH  |
| DPYSL3                                                    | ACTA1  |
| DPYSL5                                                    | ARF1   |
| WDR1                                                      | AMPH   |
| BASP1                                                     | COPS2  |
| CFH                                                       | GAPDH  |
| ACO2                                                      | HSPH1  |
| PLCB1                                                     | HSPA4  |
| UBA1                                                      | MAPT   |
| STXBP1                                                    | NLN    |
| STMN1                                                     | NDRG2  |
| SPTBN1                                                    | PCNP   |
| ARF3                                                      | PDCDP  |
| OXCT1                                                     | PDHA1  |
| MDH1                                                      | RAB3C  |
| APP                                                       | PPP3CC |
| GDI1                                                      | SNAP25 |
| SPTAN1                                                    | TAGL3  |
| ANXA11                                                    | BACE1  |
| ACSS2                                                     | OAT    |
| PGK2                                                      | SLC232 |
| PGK1                                                      |        |

**Table S4.** KEGG pathways identified for miRNAs and proteins with inverse expression relationships and their significance (*p*-value). Pathways highlighted in blue represent common pathways.

| <b>miRNA Pathways:</b>                                    | <b><i>p</i>-value:</b> | <b>Protein Pathways:</b>                  | <b><i>p</i>-value:</b> |
|-----------------------------------------------------------|------------------------|-------------------------------------------|------------------------|
| MAPK signalling pathway                                   | 8.25E-09               | Carbon metabolism                         | 4.43E-05               |
| Proteoglycans in cancer                                   | 4.80E-08               | Biosynthesis of antibiotics               | 7.85E-05               |
| Prion diseases                                            | 7.21E-08               | Glycolysis / Gluconeogenesis              | 0.001523<br>911        |
| GABAergic synapse                                         | 7.21E-08               | Biosynthesis of amino acids               | 0.002287<br>116        |
| Endocytosis                                               | 3.52E-07               | Citrate cycle (TCA cycle)                 | 0.005517<br>089        |
| Pathways in cancer                                        | 4.40E-07               | Legionellosis                             | 0.016822<br>031        |
| ECM-receptor interaction                                  | 1.06E-06               | Alzheimer's disease                       | 0.023370<br>569        |
| cAMP signalling pathway                                   | 1.98E-06               | Metabolic pathways                        | 0.024610<br>46         |
| Thyroid hormone signalling pathway                        | 2.91E-06               | Chemokine signalling pathway              | 0.030417<br>871        |
| Axon guidance                                             | 3.00E-06               | Chagas disease (American trypanosomiasis) | 0.050178<br>535        |
| Arrhythmogenic right ventricular cardiomyopathy (ARVC)    | 3.64E-06               | TNF signalling pathway                    | 0.055511<br>786        |
| Protein processing in endoplasmic reticulum               | 3.73E-06               | Endocytosis                               | 0.062059<br>843        |
| Wnt signalling pathway                                    | 3.73E-06               | Glyoxylate and dicarboxylate metabolism   | 0.097126<br>536        |
| Adherens junction                                         | 6.10E-06               |                                           |                        |
| Hippo signalling pathway                                  | 1.36E-05               |                                           |                        |
| Signalling pathways regulating pluripotency of stem cells | 2.23E-05               |                                           |                        |
| Mucin type O-Glycan biosynthesis                          | 2.41E-05               |                                           |                        |
| AMPK signalling pathway                                   | 2.46E-05               |                                           |                        |
| FoxO signalling pathway                                   | 2.46E-05               |                                           |                        |
| Glycosphingolipid biosynthesis - ganglio series           | 3.08E-05               |                                           |                        |
| Focal adhesion                                            | 3.81E-05               |                                           |                        |
| Regulation of actin cytoskeleton                          | 8.83E-05               |                                           |                        |
| Melanogenesis                                             | 0.000127801            |                                           |                        |



|                                         |             |  |
|-----------------------------------------|-------------|--|
| Insulin signalling pathway              | 0.000133724 |  |
| Prostate cancer                         | 0.000149324 |  |
| Oestrogen signalling pathway            | 0.000207177 |  |
| Glioma                                  | 0.000377612 |  |
| Transcriptional misregulation in cancer | 0.000427648 |  |
| Glutamatergic synapse                   | 0.000433217 |  |
| Oxytocin signalling pathway             | 0.000494775 |  |
| Acute myeloid leukaemia                 | 0.000699971 |  |
| T cell receptor signalling pathway      | 0.000699971 |  |
| mTOR signalling pathway                 | 0.000699971 |  |
| Long-term potentiation                  | 0.000737965 |  |
| PI3K-Akt signalling pathway             | 0.000737965 |  |
| Melanoma                                | 0.000833721 |  |
| Rap1 signalling pathway                 | 0.000845672 |  |
| TGF-beta signalling pathway             | 0.000881375 |  |
| Amphetamine addiction                   | 0.001120869 |  |
| Neurotrophin signalling pathway         | 0.001448782 |  |
| Renal cell carcinoma                    | 0.00181256  |  |
| Cocaine addiction                       | 0.002407619 |  |
| Gap junction                            | 0.002407619 |  |
| Osteoclast differentiation              | 0.002407619 |  |
| GnRH signalling pathway                 | 0.002407619 |  |
| cGMP-PKG signalling pathway             | 0.002407619 |  |
| Long-term depression                    | 0.003107746 |  |
| Basal cell carcinoma                    | 0.003107746 |  |
| Colorectal cancer                       | 0.003254237 |  |
| Gastric acid secretion                  | 0.003254237 |  |
| Chronic myeloid leukaemia               | 0.003254237 |  |
| Morphine addiction                      | 0.004372352 |  |
| Endometrial cancer                      | 0.004372352 |  |
| Salivary secretion                      | 0.004552374 |  |
| Prolactin signalling pathway            | 0.005279217 |  |
| Thyroid hormone synthesis               | 0.006137191 |  |

|                                                           |             |  |
|-----------------------------------------------------------|-------------|--|
| Dorso-ventral axis formation                              | 0.007564644 |  |
| Type II diabetes mellitus                                 | 0.009632621 |  |
| ErbB signalling pathway                                   | 0.009632621 |  |
| HTLV-I infection                                          | 0.009730591 |  |
| Bacterial invasion of epithelial cells                    | 0.009812095 |  |
| Pancreatic cancer                                         | 0.011209433 |  |
| Choline metabolism in cancer                              | 0.011209433 |  |
| Amoebiasis                                                | 0.011426703 |  |
| Notch signalling pathway                                  | 0.012762921 |  |
| Platelet activation                                       | 0.012762921 |  |
| Nicotine addiction                                        | 0.012771597 |  |
| Adrenergic signalling in cardiomyocytes                   | 0.012777049 |  |
| Phosphatidylinositol signalling system                    | 0.012808439 |  |
| Cell adhesion molecules (CAMs)                            | 0.012808439 |  |
| N-Glycan biosynthesis                                     | 0.016223308 |  |
| Hepatitis B                                               | 0.016223308 |  |
| Ubiquitin mediated proteolysis                            | 0.016223308 |  |
| Vasopressin-regulated water reabsorption                  | 0.017235861 |  |
| Hedgehog signalling pathway                               | 0.017235861 |  |
| Adipocytokine signalling pathway                          | 0.018997795 |  |
| Inositol phosphate metabolism                             | 0.019254734 |  |
| Calcium signalling pathway                                | 0.019740063 |  |
| Small cell lung cancer                                    | 0.022329205 |  |
| TNF signalling pathway                                    | 0.022329205 |  |
| Ras signalling pathway                                    | 0.023787094 |  |
| Endocrine and other factor-regulated calcium reabsorption | 0.034328134 |  |
| Lysine degradation                                        | 0.034328134 |  |
| mRNA surveillance pathway                                 | 0.034328134 |  |
| Circadian rhythm                                          | 0.035635515 |  |
| Progesterone-mediated oocyte maturation                   | 0.044951329 |  |
| Central carbon metabolism in cancer                       | 0.044994013 |  |
